# Supplementary figures and images for: Large-Scale Identification of Wolbachia pipientis Effectors
Source: PubMed Central journal article supplement — Genome Biol Evol. 2017 Jul 19;9(7):1925–37. doi: 10.1093/gbe/evx139 (PMC5544941; doi:10.1093/gbe/evx139), 2017-07-19

mean gal reps vs pFus per experiment and stressor

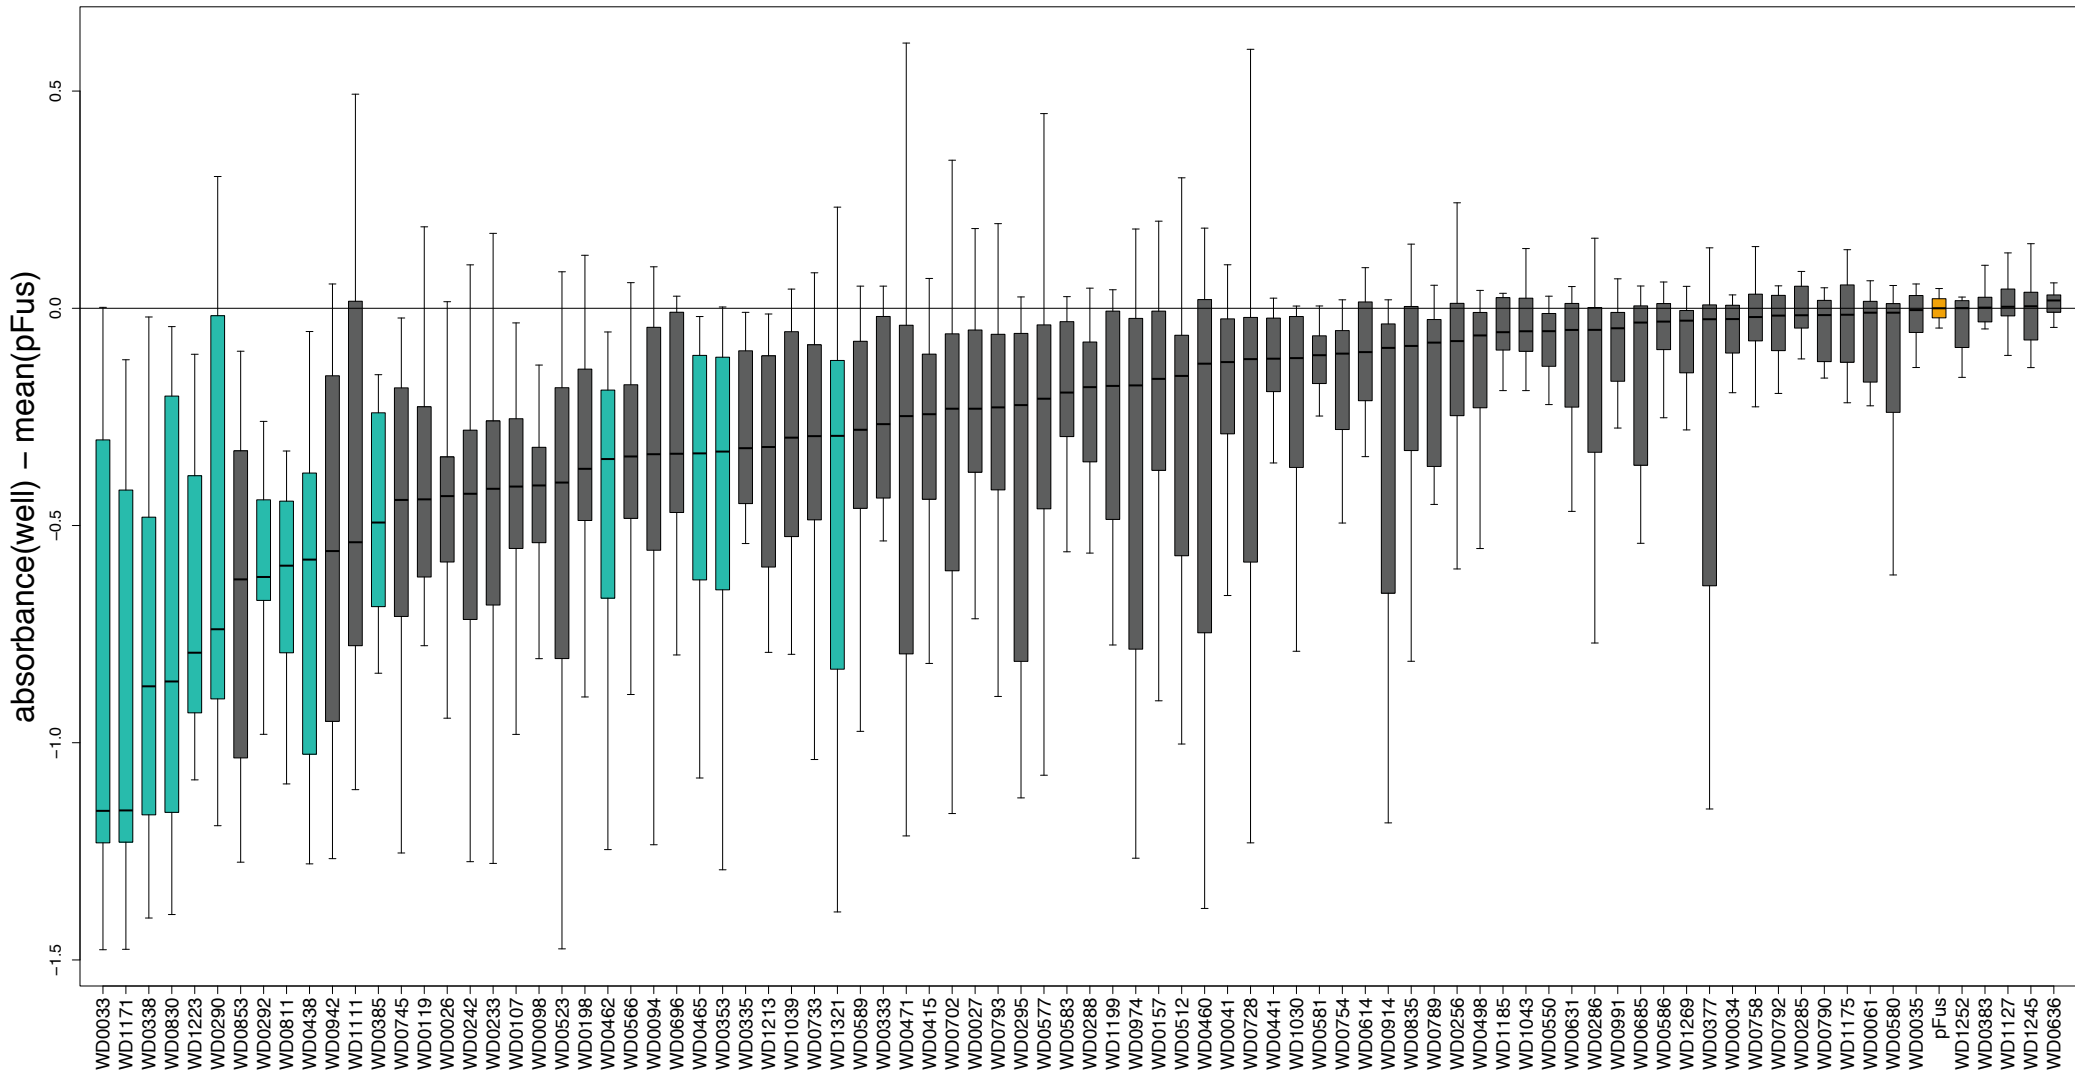

Supplement: evx139_SuppFig1.pdf [file evx139_SuppFig1.pdf]
